# Supplementary material for: A new sample preparation method for WD-XRF analysis of sulfide ores by fusion techniques: a BN crucible for protection against contamination and quantitative retention of sulfur
Source: Royal Society of Chemistry journal article supplement (doi:10.1039/c5ay02797g), 2016-01-01
Supplement: c5ay02797g1.pdf [file c5ay02797g1.pdf]

Table S1 The values of LOD and LOQ of all measured elements

| Seq. | Sample name | SiO <sub>2</sub><br>(%) | TiO <sub>2</sub><br>(%) | Al <sub>2</sub> O <sub>3</sub><br>(%) | TFe <sub>2</sub> O <sub>3</sub><br>(%) | MnO<br>(%) | MgO<br>(%) | CaO<br>(%) | Na <sub>2</sub> O<br>(%) | K <sub>2</sub> O<br>(%) | S<br>(%) | Cu<br>(%) | Pb<br>(%) | Zn<br>(%) |
|------|-------------|-------------------------|-------------------------|---------------------------------------|----------------------------------------|------------|------------|------------|--------------------------|-------------------------|----------|-----------|-----------|-----------|
| 1    | KONG        | 0.02                    | 0                       | 0.01                                  | 0.09                                   | 0          | 0.08       | 0.04       | 0.02                     | 0.01                    | -0.02    | 0         | 0.06      | 0         |
| 2    | KONG        | 0.01                    | 0                       | 0.01                                  | 0.09                                   | 0          | 0.09       | 0.05       | 0.01                     | 0.01                    | 0        | 0         | 0.06      | 0         |
| 3    | KONG        | 0.03                    | 0                       | 0.02                                  | 0.09                                   | 0          | 0.08       | 0.04       | 0.01                     | 0.01                    | 0        | 0         | 0.08      | 0         |
| 4    | KONG        | 0.01                    | 0                       | 0                                     | 0.09                                   | 0          | 0.08       | 0.04       | 0.03                     | 0.02                    | -0.02    | 0         | 0.06      | 0         |
| 5    | KONG        | 0.02                    | 0                       | 0                                     | 0.09                                   | 0          | 0.09       | 0.04       | 0.02                     | 0.01                    | 0        | 0         | 0.06      | 0         |
| 6    | KONG        | 0.06                    | 0                       | -0.03                                 | 0.1                                    | 0          | 0.07       | 0.03       | 0.03                     | 0.01                    | -0.02    | 0.01      | 0.08      | 0         |
| 7    | KONG        | 0.05                    | 0                       | 0.01                                  | 0.1                                    | 0          | 0.07       | 0.03       | 0.01                     | 0.01                    | -0.02    | 0.01      | 0.08      | 0         |
| 8    | KONG        | 0.06                    | 0                       | 0                                     | 0.1                                    | 0          | 0.07       | 0.03       | 0.05                     | 0                       | -0.02    | 0.01      | 0.08      | 0         |
| SD   | $\sigma$    | 0.023                   | 0.00                    | 0.015                                 | 0.005                                  | 0.00       | 0.008      | 0.007      | 0.014                    | 0.005                   | 0.01     | 0.005     | 0.01      | 0.00      |
| LOD  | 3 $\sigma$  | 0.07                    | 0.00                    | 0.04                                  | 0.02                                   | 0.00       | 0.03       | 0.02       | 0.04                     | 0.02                    | 0.03     | 0.02      | 0.03      | 0.00      |
| LOQ  | 10 $\sigma$ | 0.23                    | 0.00                    | 0.15                                  | 0.05                                   | 0.00       | 0.08       | 0.07       | 0.14                     | 0.05                    | 0.10     | 0.05      | 0.11      | 0.00      |

1

Table S2 The recommended values of twelve standards used in this paper

| Constituent /% | SiO <sub>2</sub> | TiO <sub>2</sub> | Al <sub>2</sub> O <sub>3</sub> | TFe <sub>2</sub> O <sub>3</sub> | MnO   | MgO   | CaO   | Na <sub>2</sub> O | K <sub>2</sub> O | S     | Cu     | Pb    | Zn    |
|----------------|------------------|------------------|--------------------------------|---------------------------------|-------|-------|-------|-------------------|------------------|-------|--------|-------|-------|
| GBW07233       |                  |                  |                                |                                 |       |       |       |                   |                  |       |        |       |       |
| (GSO-Cu-1)     | 9.27             | 0.079            | 1.73                           | 55.58                           | 0.6   | 3.91  | 9.61  | 0.044             | 0.071            | 0.72  | 1.15   | 9.1*  | 0.059 |
| GBW07234       |                  |                  |                                |                                 |       |       |       |                   |                  |       |        |       |       |
| (GSO-Cu-2)     | 53.36            | 0.5              | 15.18                          | 12.25                           | 0.12  | 1.3   | 4.95  | 3.21              | 2.71             | 0.14  | 0.19   | 13*   | 0.013 |
| GBW07235       |                  |                  |                                |                                 |       |       |       |                   |                  |       |        |       |       |
| (GSO-Pb-1)     | 43.63            | 0.53             | 12.88                          | 4.37                            | 1.4   | 1.62  | 19.51 | 1.61              | 1.42             | 0.86  | 0.2    | 4.17  | 0.062 |
| GBW07236       |                  |                  |                                |                                 |       |       |       |                   |                  |       |        |       |       |
| (GSO-Pb-2)     | 30.51            | 0.44             | 8.95                           | 3.79                            | 1.53  | 2.06  | 34.56 | 0.066             | 0.82             | 0.38  | 0.035  | 0.61  | 0.092 |
| GBW07237       |                  |                  |                                |                                 |       |       |       |                   |                  |       |        |       |       |
| (GSO-Zn-1)     | 82.95            | 0.017            | 2.8                            | 3.5                             | 0.026 | 0.082 | 1.91  | 0.56              | 0.99             | 2.87  | 0.71   | 0.25  | 2.75  |
| GBW07162       |                  |                  |                                |                                 |       |       |       |                   |                  |       |        |       |       |
| (GSO-1)        | 63               |                  | 14.1                           | 6.69                            | 0.12  | 1.55  | 1.52  | 0.68              | 3.85             | 2.67  | 0.264  | 0.43  | 0.83  |
| GBW07163       |                  |                  |                                |                                 |       |       |       |                   |                  |       |        |       |       |
| (GSO-2)        | 47.9             |                  | 11.2                           | 12.01                           | 0.491 | 1.39  | 4.7   | 0.24              | 3.1              | 6.74  | 1.05   | 2.17  | 4.26  |
| GBW07164       |                  |                  |                                |                                 |       |       |       |                   |                  |       |        |       |       |
| (GSO-3)        | 40.6             |                  | 7.8                            | 16.3                            | 0.31  | 2.33  | 17.2  | 0.54              | 1.79             | 5.95  | 2.8    | 0.056 | 0.143 |
| GBW07165       |                  |                  |                                |                                 |       |       |       |                   |                  |       |        |       |       |
| (GSO-4)        | 14.1             |                  | 2.5                            | 28.02                           | 0.09  | 0.59  | 6.5   | 0.03              | 0.78             | 29    | 0.096  | 5.13  | 13.9  |
| JZn-1          | 44               | 0.2              | 6.32                           | 16.87                           | 1.49  | 1.94  | 18.1  | 0.45              | 0.83             | 1.3   | 0.0029 | 0.161 | 2.22  |
| CAN RTS-3a     | 39.11            | 0.586            | 9.67                           | 29.29                           | 0.205 | 4.11  | 2.99  | 0.922             | 0.554            | 9.59  | 0.235  | 0.021 | 0.289 |
| CAN SU-1b      | 32.58            |                  | 8.12                           | 36.51                           | 0.091 | 2.97  | 3.09  | 2.157             | 0.723            | 14.14 | 1.185  | 58*   | 235*  |

PS: the value with \* means the unit is ppm

Table S3 The values of  $U_s$  and RMS of the 13 analysis elements

| Constituent | SiO <sub>2</sub> | TiO <sub>2</sub> | Al <sub>2</sub> O <sub>3</sub> | TFe <sub>2</sub> O <sub>3</sub> | MnO   | MgO   | CaO   | Na <sub>2</sub> O | K <sub>2</sub> O | S      | Cu    | Pb    | Zn    |
|-------------|------------------|------------------|--------------------------------|---------------------------------|-------|-------|-------|-------------------|------------------|--------|-------|-------|-------|
| $U_s$       | 0.005            | 0.042            | 0.011                          | 0.009                           | 0.037 | 0.062 | 0.016 | 0.091             | 0.037            | 0.028  | 0.022 | 0.022 | 0.021 |
| RMS         | 0.308            | 0.011            | 0.109                          | 0.245                           | 0.010 | 0.036 | 0.111 | 0.015             | 0.047            | 0.0757 | 0.018 | 0.025 | 0.049 |

Table S4 The calculation example of uncertainties in table 4

| CAN RTS-3A     | SiO <sub>2</sub> | S       |
|----------------|------------------|---------|
| Average        | 39.14            | 9.34    |
| SD             | 0.08             | 0.007   |
| $U_m$          | 0.00118          | 0.00043 |
| $U_f$          | 0.00789          | 0.0081  |
| (Type A) $U_A$ | 0.008            | 0.0081  |
| $U_s$          | 0.0054           | 0.0276  |
| $U_b$          | 0.00051          | 0.00051 |
| (Type B) $U_B$ | 0.0055           | 0.0276  |
| $U_C$          | 0.38             | 0.27    |
| $U$            | 0.76             | 0.54    |

Table S5 The detailed information of the recognised comparison methods that used in table 5

| Constituent                                                                                                                                  | Technique                                                                                                                   | Literature                                                                                                                             |
|----------------------------------------------------------------------------------------------------------------------------------------------|-----------------------------------------------------------------------------------------------------------------------------|----------------------------------------------------------------------------------------------------------------------------------------|
| SiO <sub>2</sub>                                                                                                                             | Combination with gravimetry and AAS;<br>alkali fusion with Na <sub>2</sub> CO <sub>3</sub> / H <sub>3</sub> BO <sub>3</sub> | S. Terashima, Bull. Geol. Surv. Japan, 1979; 30: 37.<br>S. Terashima, T. Yamashige and A. Ando, Bull. Geol. Surv. Japan, 1984; 35: 171 |
| TiO <sub>2</sub> / Al <sub>2</sub> O <sub>3</sub> / TFe <sub>2</sub> O <sub>3</sub> / MnO / MgO / CaO / Na <sub>2</sub> O / K <sub>2</sub> O | ICP-AES; acid digestion with HF / HNO <sub>3</sub> / HClO <sub>4</sub>                                                      | S. Terashima, Geostandards Newsletter, 2003; 27:259                                                                                    |
| S                                                                                                                                            | Combustion and infrared absorption spectrometry                                                                             | S. Terashima Geostandards Newsletter, 1988; 12:249                                                                                     |
| Cu / Pb / Zn                                                                                                                                 | AAS; acid digestion with HF / HNO <sub>3</sub> / HClO <sub>4</sub>                                                          | S. Terashima and A. Ando Geostandards Newsletter, 1987; 11: 75                                                                         |
